# Supplementary material
Source: publisher site journal article supplement (https://www.dovepress.com/article/576538)
Supplement: Supplementary file 1 [file 576538%20Supplementary%20Material.docx]

# **Heparin-Conjugated Silver Nanoparticles via Amide Chemistry for Selective Targeting of Triple-Negative Breast Cancer and Pathogenic Fungi**

**Jayshree H Ahire 1*, Qi Wang 2, Yongping Bao 2, Isabelle Storer3, Stefan Bidula3, Gary Rowley4, Jason Crack5**

1 School of Chemistry and Pharmacy (CPP), University of East Anglia, United Kingdom;

e-mail@ j.ahire@uea.ac.uk ; s.bidula@uea.ac.uk, i.storer@uea.ac.uk, j.crack@uea.ac.uk

2 Norwich Medical School, University of East Anglia, United Kingdom; q.wang1@uea.ac.uk ; y.bao@uea.ac.uk

3 School of biological science, University of East Anglia, United Kingdom ; g.rowley@uea.ac.uk

***** **Correspondence: j.ahire@uea.ac.uk**

## Cytotoxicity assessment of hep-AgNPs

**Supplementary Figure 1:** Cytotoxicity assessment of hep-AgNPs synthesized at varying Ag:heparin ratios in HaCaT and L929 cell lines after 24 and 48 hours of exposure. The data illustrate the impact of different Ag:Hep formulations on cell viability. All experiments were performed in triplicate. error bars represent standard deviation (±0.5 – 4.5).

## Design of experiment of hep-AgNPs in bacterial system

### *Antibacterial activity of hep-AgNPs in Escherichia Coli JM109*

**Supplementary figure 2:** **(a)**Comparative analysis of hep-AgNPs synthesized at different Ag:heparin ratios assessed in *E. coli* JM109 bacterial cells. The calculated IC₅₀ values highlight the bactericidal efficacy of each nanoparticle formulation relative to silver nitrate (AgNO₃), demonstrating the impact of heparin content on antibacterial activity.**(b)** Dose–response curves showing the antibacterial activity of hep-AgNPs against *E. Coli* JM109 after 4 and 48 hours of treatment. The IC₅₀ values were calculated based on cell viability reduction, indicating time-dependent enhancement in antibacterial efficacy. **(c)***E. Coli* JM109 bacteria in Tryptic soy broth (37°C) treated with hep-AgNPs with the ratio of 1:1 Ag to hep at 4hr and 48 hrs.(**d)***E. Coli* JM109 bacteria treated with hep-AgNPs with the ratio of 1:4 and 1:12 of Ag to hep at 4hr and 48 hrs. **(e)** *E. Coli* JM109 bacteria were tested with silver nitrate at 0, 4 and 7 hrs in tryptic soy broth (37°C), the dose response plot highlights the IC50 of silver nitrate 3.7 (mg/L) at 4 h.

## UV visible and DLS spectroscopy of hep-AgNPs

Supplementary Figure 1 shows the UV-vis and DLS spectra of hep-AgNPs in water.

**Supplementary figure 3:** UV–Vis absorption spectrum (a) and (b) dynamic light scattering (DLS) profile of heparin-capped silver nanoparticles (hep-AgNPs) dispersed in water, confirming their optical properties and hydrodynamic size distribution.
